# Supplementary material for: Distinct mechanisms govern the localisation of Drosophila CLIP-190 to unattached kinetochores and microtubule plus-ends
Source: Oxford University Press journal article supplement (doi:10.1242/jcs.02504), 2005-08-15
Supplement: jcs02504s1.pdf [file jcs02504s1.pdf]

## RNAi primer sequences:

For 2<sup>nd</sup>:

Both 5'- and 3'- primers:

PCR-T7 minimum promotor sequence:  
gaattaatacgaactcactataggaga

For NudE:

5' – cgactcactataggagactcaagttggaatcgc  
3' – cgactcactataggagatcttaagcgaatgctgct

For  $\beta$ -Lactamase:

5'–cgactcactataggagattcctgttttgcacc  
3'–cgactcactataggagaagtgaggcacctatctca

For Dic:

5'–cgactcactataggagacgctgtactccttgagg  
3'–cgactcactataggagactatcgatttcattgaa

For CLIP-190:

5'–cgactcactataggagaagctcagcaagtgaaca  
3'–cgactcactataggagattgaagagtcctctcct

For p150<sup>Glued</sup>:

5'–cgactcactataggagaccaccagcgattcagtc  
3'–cgactcactataggagattcttctccgctagatcc

For EB1:

5'–cgactcactataggagaatggctgtaaacgtctac  
3'–cgactcactataggagatgcccgctgttgacc

For BubR1:

5'–cgactcactataggagatgggcttgatatacacg  
3'–cgactcactataggagaccatgtcaagtcaccat

For Mad1:

5'–cgactcactataggagaaactgagcgaatatcgcc  
3'–cgactcactataggagaattcaaatgcttggtatc

For Rod:

5'–cgactcactataggagacggcgctcagcaagagcgc  
3'–cgactcactataggagagagggcgctgatgctgc

For CENP-meta:

5'–cgactcactataggagagaggaagtaaccagcctaag  
3'–cgactcactataggagagatgttgagcttgccactgt

For Dhc:

5'–cgactcactataggagacgctggaacctgtccct  
3'–cgactcactataggagatcagcctggagatccc

For Lis1:

5'–cgactcactataggagacctcctgcagcgggact  
3'–cgactcactataggagactatggaggtgcagaaat

For NudC:

5'–cgactcactataggagagcaatcgctagtaaggg  
3'–cgactcactataggagaccagctgcgatcgtgct

For NudC-like

5' – cgactcactataggagaattgttatcgatagacgt  
3' – cgactcactataggagagctatgcttgcctcctc
