# Supplementary material for: Distinct mechanisms govern the localisation of Drosophila CLIP-190 to unattached kinetochores and microtubule plus-ends
Source: Oxford University Press journal article supplement (doi:10.1242/jcs.02504), 2005-08-15
Supplement: jcs02504s2.pdf [file jcs02504s2.pdf]

| Protein depleted | Western blot                                                                                                                                                                   | Effect on CLIP-190 localization               | Other phenotype observed                                                                                                                           |
|------------------|--------------------------------------------------------------------------------------------------------------------------------------------------------------------------------|-----------------------------------------------|----------------------------------------------------------------------------------------------------------------------------------------------------|
| CLIP-190         | 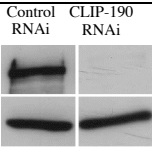 <p>Control RNAi    CLIP-190 RNAi</p> <p>CLIP-190</p> <p>Tubulin</p> <p>6 Days RNAi</p>       | CLIP-signal disappears                        | -                                                                                                                                                  |
| EB1              |  <p>Control RNAi    EB1 RNAi</p> <p>Tubulin</p> <p>EB1</p> <p>6 Days RNAi</p>                 | Removes CLIP-190 From interphase MT-plus-ends | EB1 signal decreases;<br>Small and unastral mitotic spindles                                                                                       |
| Rod              | -                                                                                                                                                                              | Removes CLIP-190 from unattached kinetochores | Low mitotic index (MI; 1.6%, compared to 2.4% in control)<br>Failure to arrest in colchicine (3.9% MI, compared to 22.1% in control)               |
| Dhc              | -                                                                                                                                                                              | Removes CLIP-190 from unattached kinetochores | High MI (7.2%, compared to 2.4% in control);<br>Inefficient arrest in colchicine (12.9% MI, compared to 22.1% in control)                          |
| Dic              |  <p>Control RNAi    Dic RNAi</p> <p>Dic</p> <p>Tubulin</p> <p>5 Days RNAi</p>                 | Removes CLIP-190 from unattached kinetochores | High MI (8.1%, compared to 4.6% in control);<br>Inefficient arrest in colchicine (15% MI, compared to 27% in control)                              |
| p150-Glued       |  <p>Control RNAi    p150-Glued RNAi</p> <p>p150-Glued</p> <p>Tubulin</p> <p>5 Days RNAi</p> | Removes CLIP-190 from unattached kinetochores | High MI (7.5%, compared to 4.6% in control);<br>Inefficient arrest in colchicine (11% MI, compared to 27% in control)                              |
| Lis1             | -                                                                                                                                                                              | Removes CLIP-190 from unattached kinetochores | High MI (11.7%, compared to 2.4% in control);<br>Inefficient arrest in colchicine (19.5% MI, compared to 22.8% in control)                         |
| Mad1             | -                                                                                                                                                                              | -                                             | Low MI (0.4%, compared to 3.1% in control);<br>Failure to arrest in colchicine (1.7% MI, compared to 16.3% in control)                             |
| BubR1            | -                                                                                                                                                                              | BubR1 signal disappears                       | Low MI (0.3%, compared to 3.2% in control);<br>Failure to arrest in colchicine (0.5% MI, compared to 22.1% in control)                             |
| CENP-meta        | -                                                                                                                                                                              | -                                             | Chromosome misalignment;<br>Low MI (2%, compared to 3.5% in control);<br>Inefficient arrest in colchicine (11.5% MI, compared to 15.4% in control) |
| NudE             | -                                                                                                                                                                              | -                                             | High MI (5.8%, compared to 3.1% in control);<br>Inefficient arrest in colchicine (15.8% MI, compared to 20% in control)                            |
| NudC             | -                                                                                                                                                                              | -                                             | Cells quite sick<br>Low MI (0.8%, compared to 3.1% in control);<br>Failure to arrest in colchicine (6.7% MI, compared to 20% in control)           |
| NudC-like        | -                                                                                                                                                                              | -                                             | -                                                                                                                                                  |

All counts for mitotic index (MI) were done for at least 1000 cells per sample.
