# Supplementary material for: Distinct mechanisms govern the localisation of Drosophila CLIP-190 to unattached kinetochores and microtubule plus-ends
Source: Oxford University Press journal article supplement (doi:10.1242/jcs.02504), 2005-08-15
Supplement: jcs02504s4.pdf [file jcs02504s4.pdf]

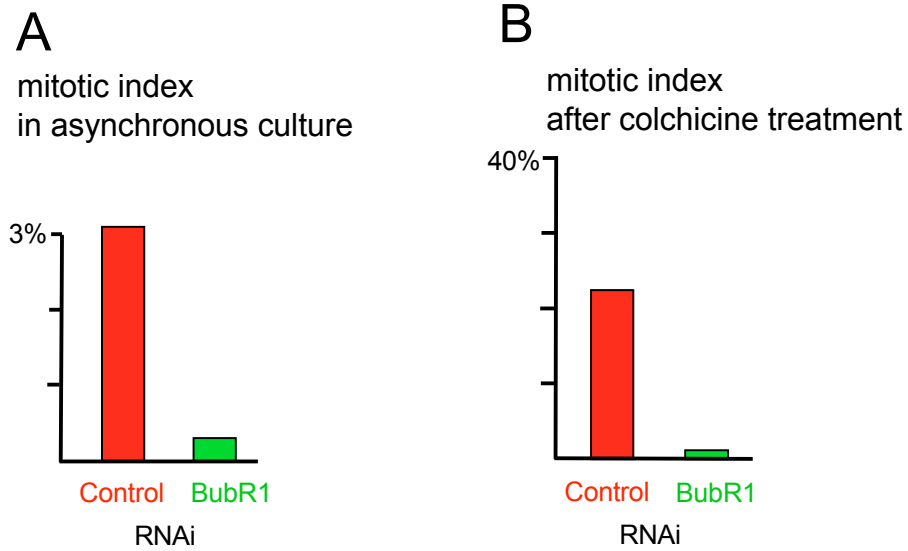

**Supplementary Figure 4. Checkpoint defect induced by BubR1 RNAi.**

**(A)** Low mitotic index in BubR1 RNAi. The mitotic index of asynchronously growing S2 cells after control (red bar) or BubR1 RNAi (green bar; n=1000 for both). **(B)** Failure to arrest in overnight colchicine treatment after BubR1 RNAi. The mitotic index of S2 cells, treated overnight with colchicine, after control (red bar) or BubR1 RNAi (green bar; n=1000 for both).
